# Supplementary material
Source: PubMed Central journal article supplement (PMC3601833)

**A** **$\Delta$ Sucrose**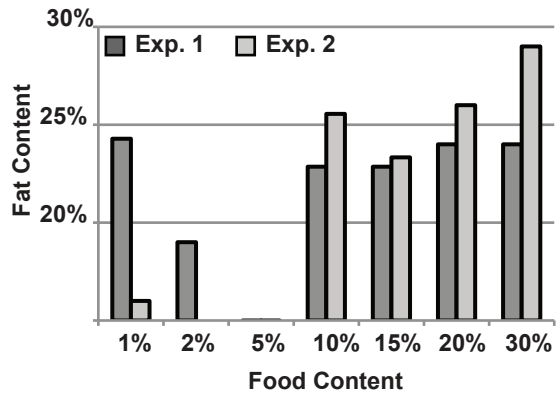 **$\Delta$ Yeast**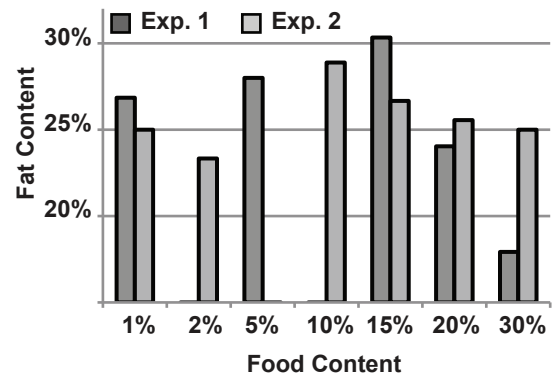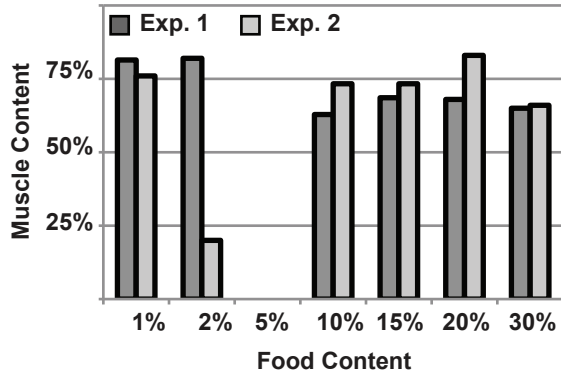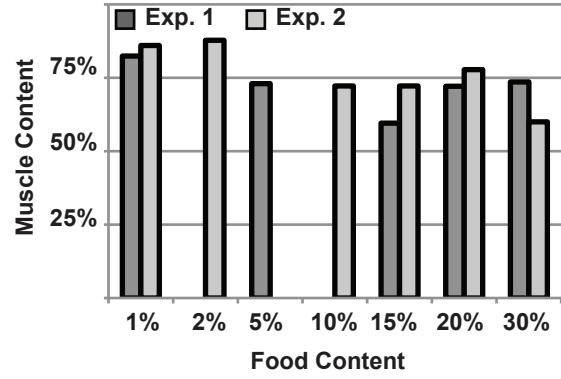**B** **$\Delta$  Sucrose**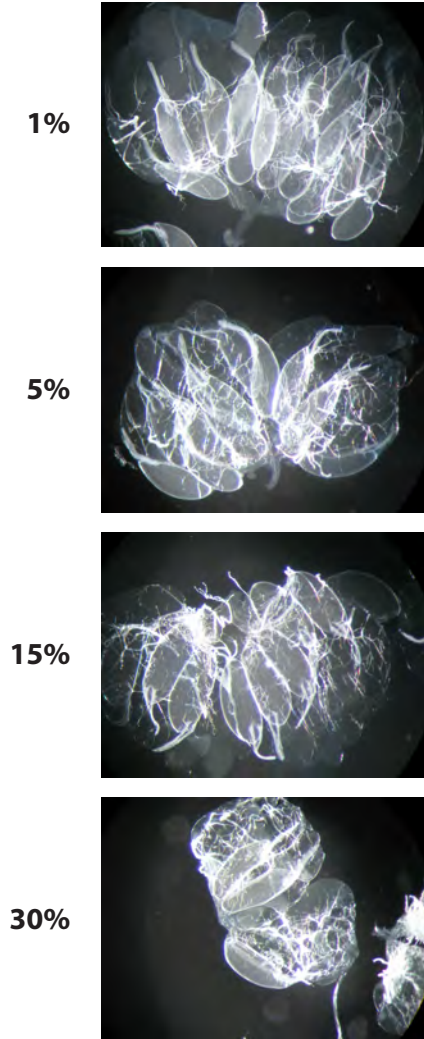 **$\Delta$  Yeast**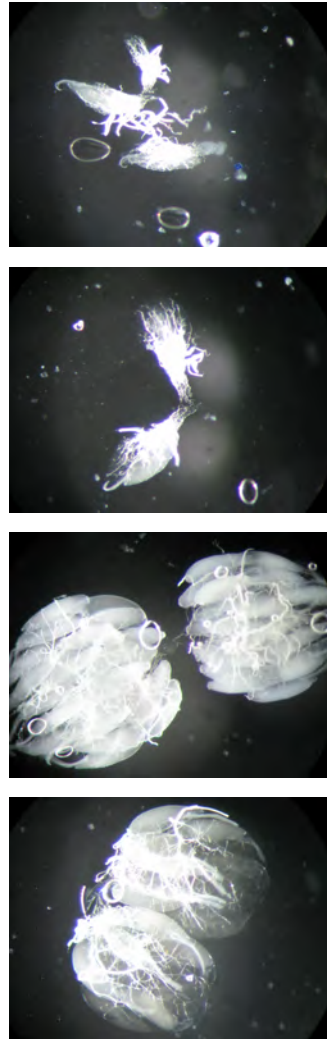

Supplement: NIHMS372032-supplement-01.pdf [file NIHMS372032-supplement-01.pdf]

A

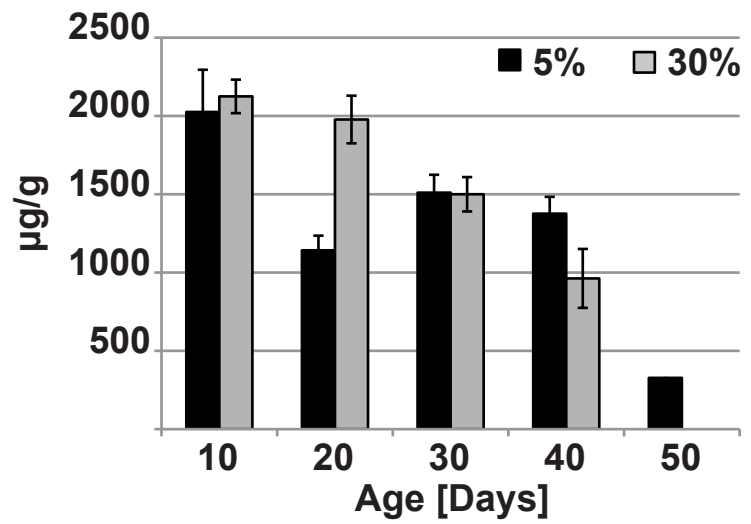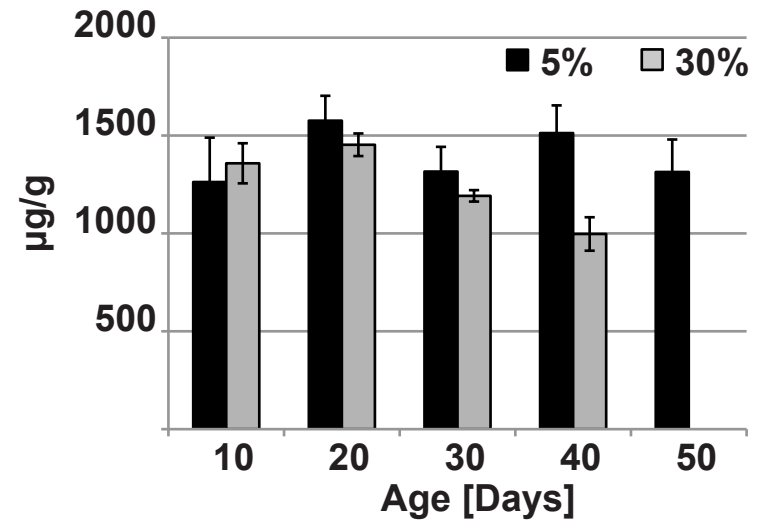

Supplement: NIHMS372032-supplement-02.pdf [file NIHMS372032-supplement-02.pdf]

$\Delta$  Sucrose

$\Delta$  Yeast

A

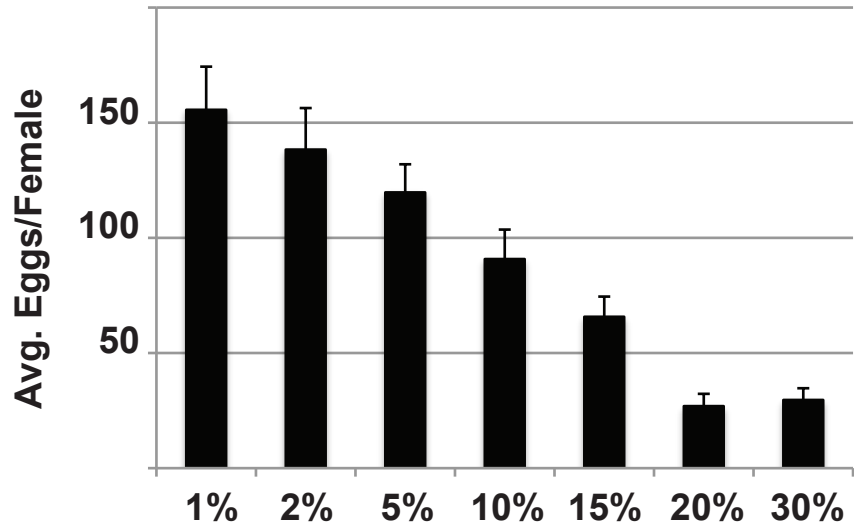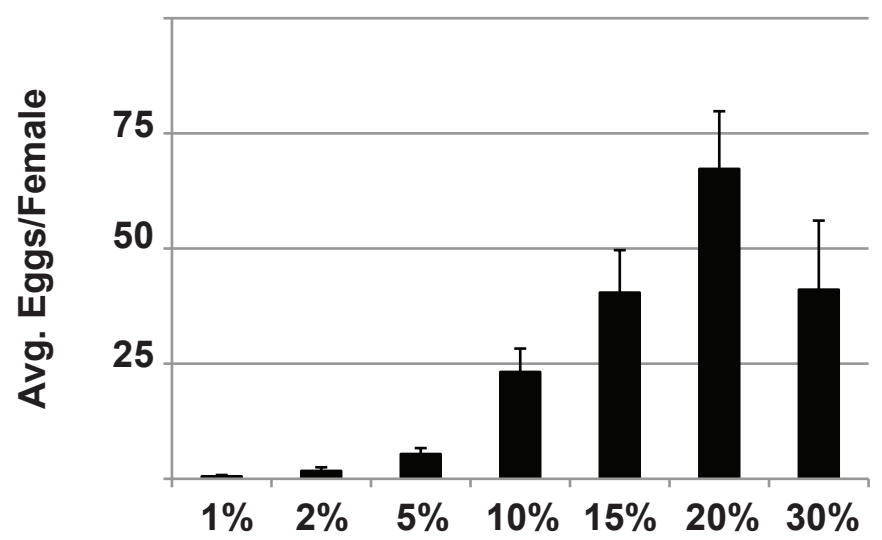

B

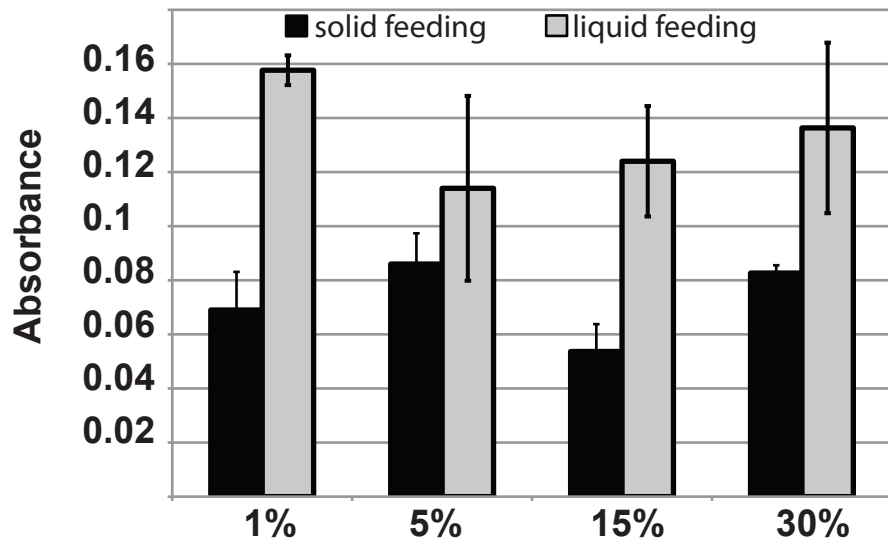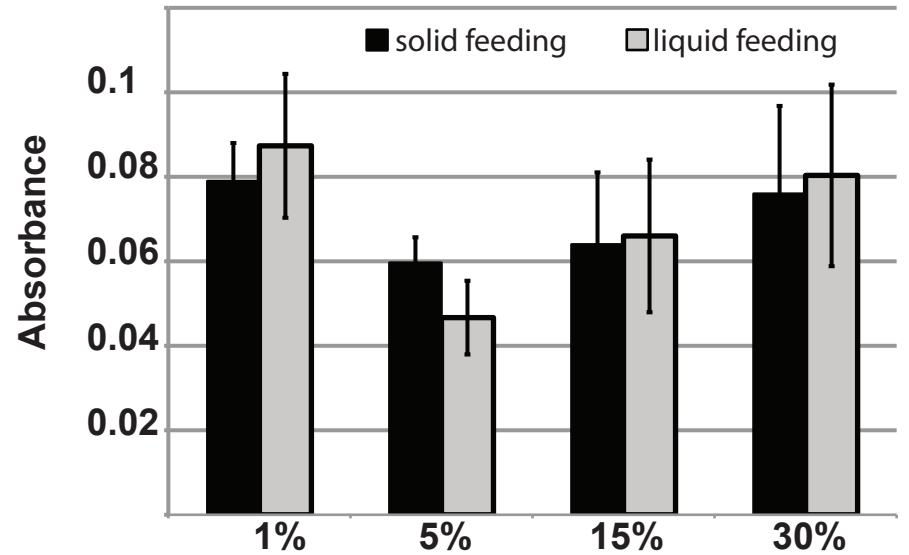

Supplement: NIHMS372032-supplement-03.pdf [file NIHMS372032-supplement-03.pdf]
